# Supplementary material for: Magnetic starch nanocomposite as a green heterogeneous support for immobilization of large amounts of copper ions: heterogeneous catalyst for click synthesis of 1,2,3-triazoles
Source: Royal Society of Chemistry journal article supplement (doi:10.1039/c5ra25519h), 2016-01-01

## Magnetic Starch Nanocomposite as a Green Heterogeneous Support for Immobilization of Large Amounts of Copper Ions

Ali Pourjavadi\*, Anahita Motamedi, Seyed Hassan Hosseini, Mojtaba Nazari

*Polymer Research Laboratory, Department of Chemistry, Sharif University of Technology, Tehran, Iran*

*E-mail address: purjavad@sharif.edu; Phone/fax: (982)166165311*

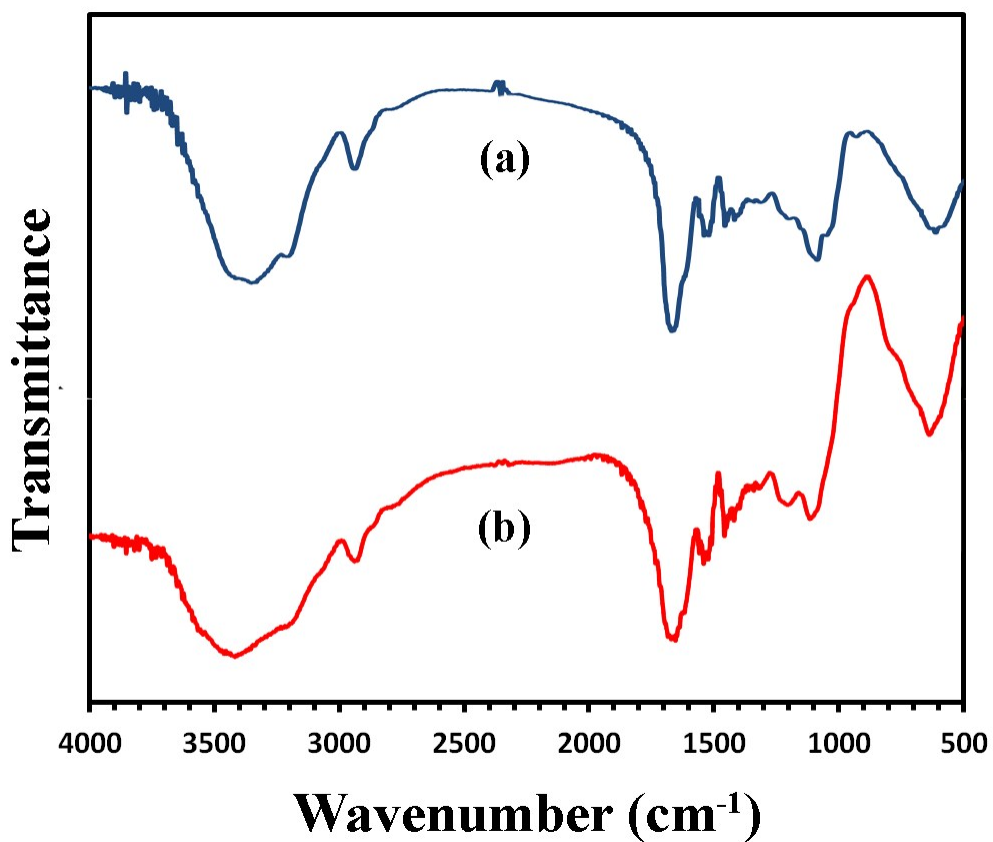

**Fig. S1** FT-IR spectra of fresh (a) and recycled (b) catalyst.

### **<sup>1</sup>H NMR of selected compounds:**

#### **1-phenyl-2-(4-phenyl-1H-1,2,3-triazol-1-yl)ethanone:**

Colourless solid; <sup>1</sup>H NMR (400 MHz, CDCl<sub>3</sub>) δ 5.93 (s, 2H), 7.36-7.90 (m, 6H), 8.01 (d, *J* = 7.2 Hz, 2H); 8.04 (s, 1H); 8.06 (d, *J* = 7.2 Hz, 2H); <sup>13</sup>C NMR (100 MHz, CDCl<sub>3</sub>) δ 55.4, 121.4, 125.8, 128.2, 128.8, 129.2, 130.5, 133.9, 134.6, 148.2, 190.2

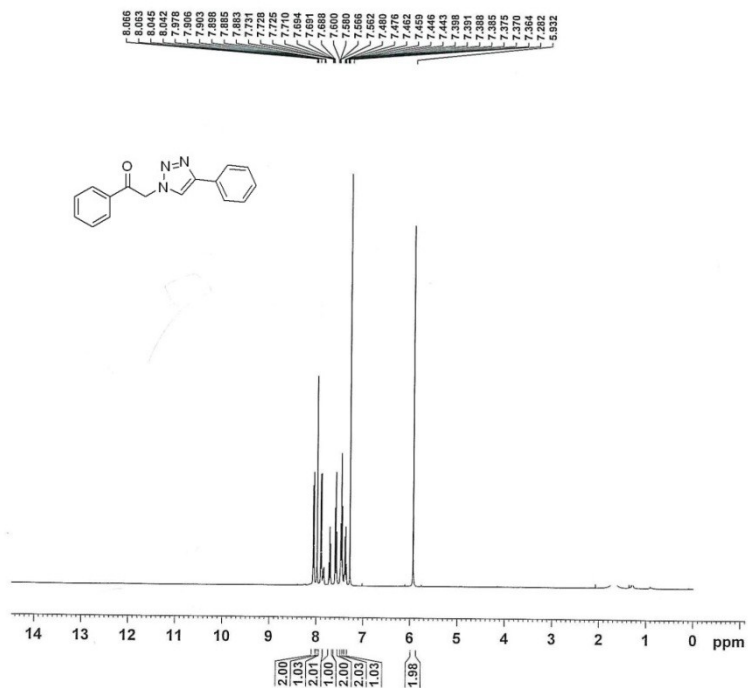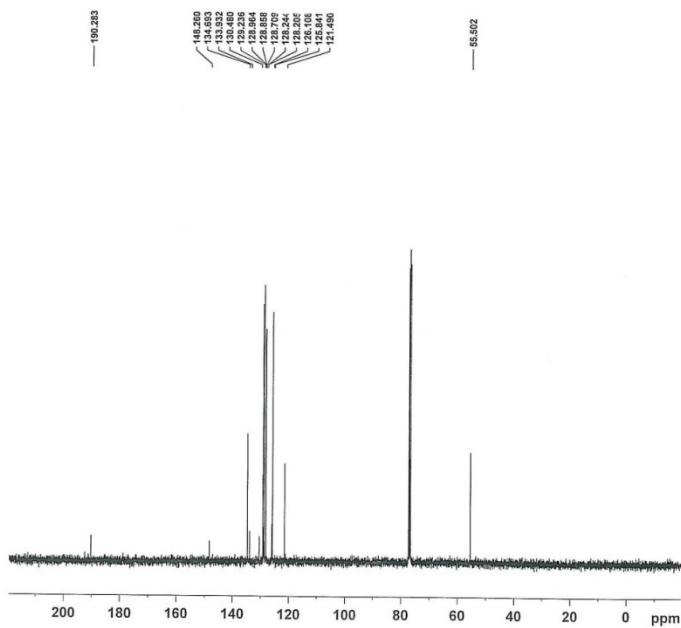

**ethyl 2-(4-phenyl-1H-1,2,3-triazol-1-yl)acetate:**

$^1\text{H}$  NMR (400 MHz,  $\text{CDCl}_3$ )  $\delta$ : 1.33 (3H, t,  $J=7.6$  Hz), 4.26 (2H, q,  $J=7.6$  Hz), 5.20 (2H, s), 7.34-7.46 (3H, m), 7.85-7.87 (2H, m, ortho to Ar), 7.93 (1H, s);

$^{13}\text{C}$  NMR (100MHz,  $\text{CDCl}_3$ )  $\delta$ : 14.0, 50.9, 62.4, 121.0, 125.8, 128.3, 128.8, 130.3, 148.2, 166.3;

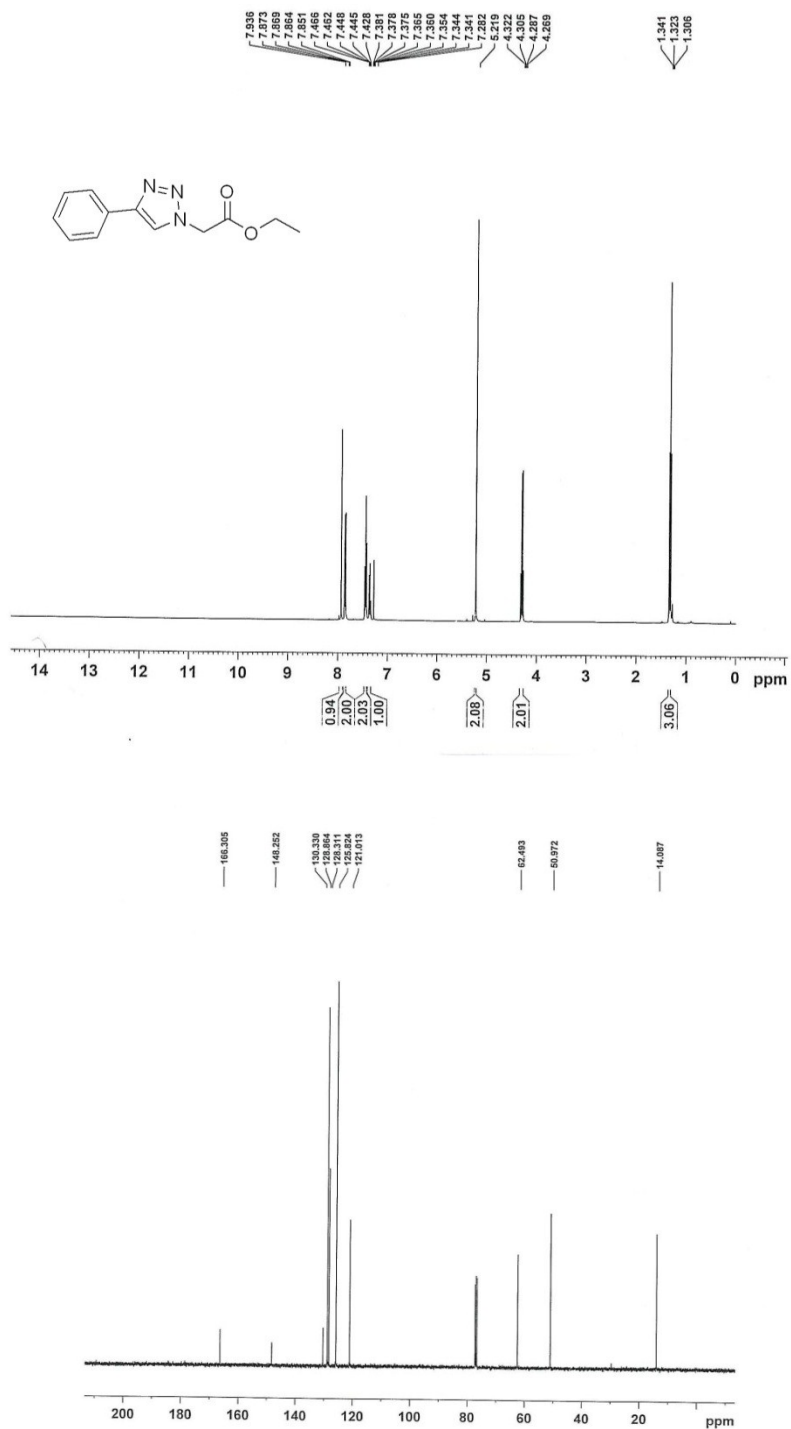

**1-(4-bromobenzyl)-4-phenyl-1H-1,2,3-triazole:**

$^1\text{H}$  NMR (400 MHz,  $\text{CDCl}_3$ )  $\delta$  = 5.69 (2H, s), 7.31-7.36 (1H, m), 7.40-7.44 (4H, m), 7.76 (s, 1 H), 7.81 (2H, d,  $J$  = 6.8 Hz), 8.22 (2H, d,  $J$  = 6.8 Hz);  $^{13}\text{C}$  NMR (100 MHz,  $\text{CDCl}_3$ ) 53.1, 119.7, 124.0, 124.2, 125.7, 128.4, 128.5, 128.8, 130.0, 141.7, 148.0, 148.6;

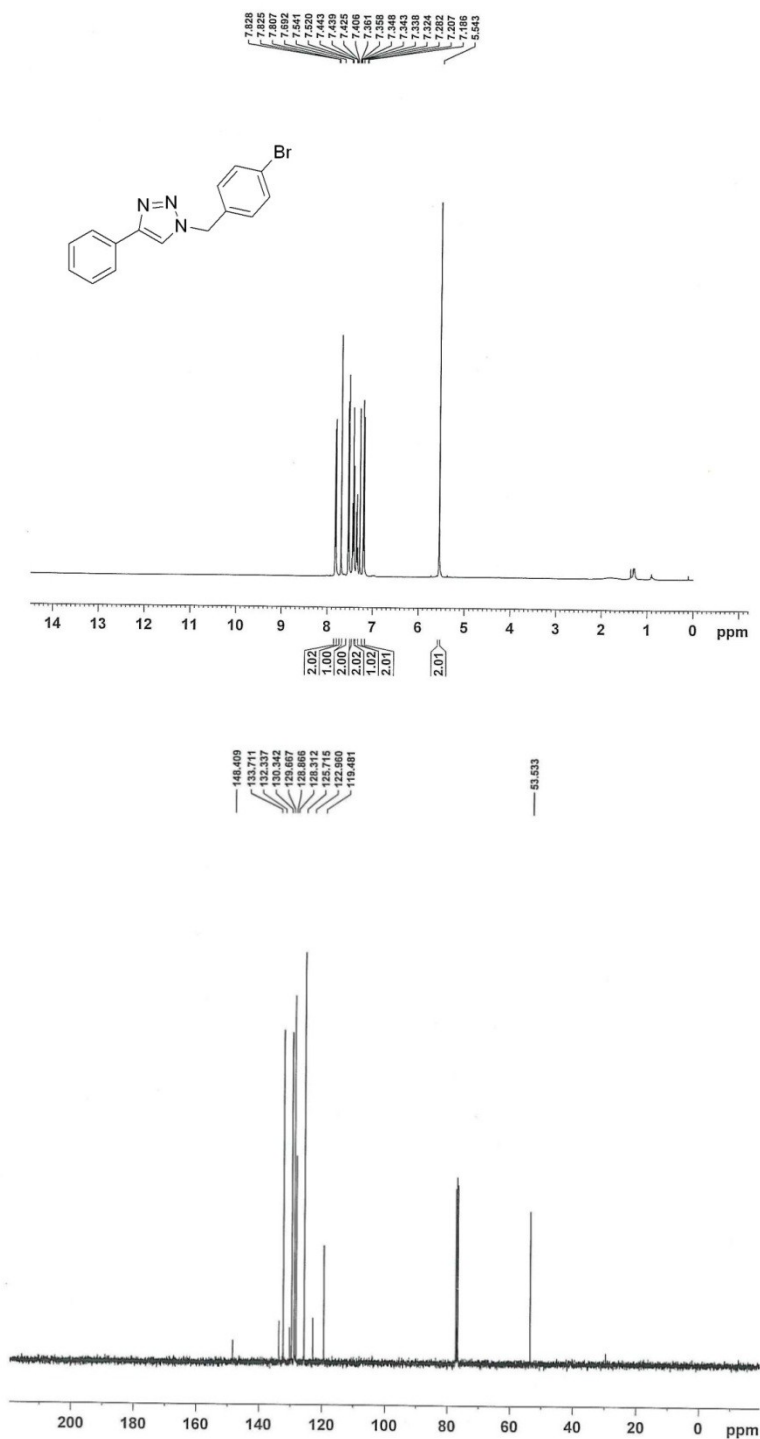

### 1-allyl-4-pentyl-1H-1,2,3-triazole:

$^1\text{H NMR}$  (400 MHz,  $\text{CDCl}_3$ )  $\delta$  = 1.28 (3H, t), 1.32-1.37 (2H, m), 1.35-1.36 (4H, m), 1.67 (2H, t), 2.27 (2H, t), 4.92 (2H, d), 5.26-5.36 (2H, m), 5.97-6.05 (1H, m), 7.46 (1H, s);  $^{13}\text{CNMR}$  (100 MHz,  $\text{CDCl}_3$ ) : 13.8, 22.4, 25.6, 29.6, 30.9, 31.4, 119.7, 120.4, 130.0, 148.7

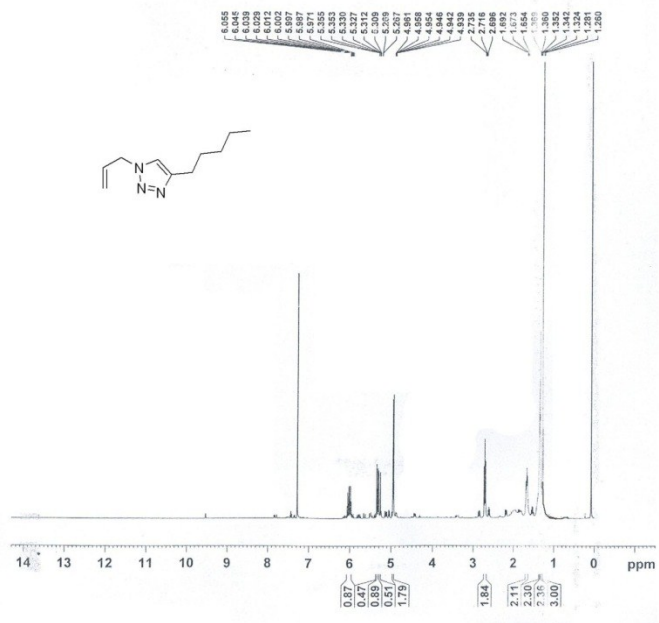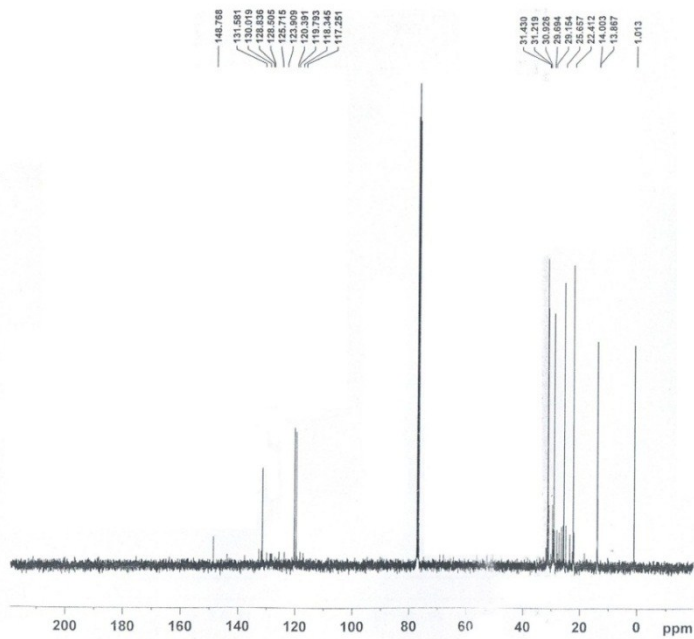

**2-(4-phenyl-1H-1,2,3-triazol-1-yl)acetamide:**

White solid, mp 102-104°C;

$^1\text{H}$  NMR (400 MHz,  $\text{CDCl}_3$ )  $\delta$ : 1.62 (2H, broad), 5.93 (2H, s), 7.28 (1H, s), 7.40-7.40 (2H, m), 7.83-7.99 (3H, m, ortho to Ar)

$^{13}\text{C}$  NMR (100 MHz,  $\text{CDCl}_3$ )  $\delta$ : 29.70, 109.64, 115.73, 118.78, 126.11, 128.98, 144.50, 185.11;

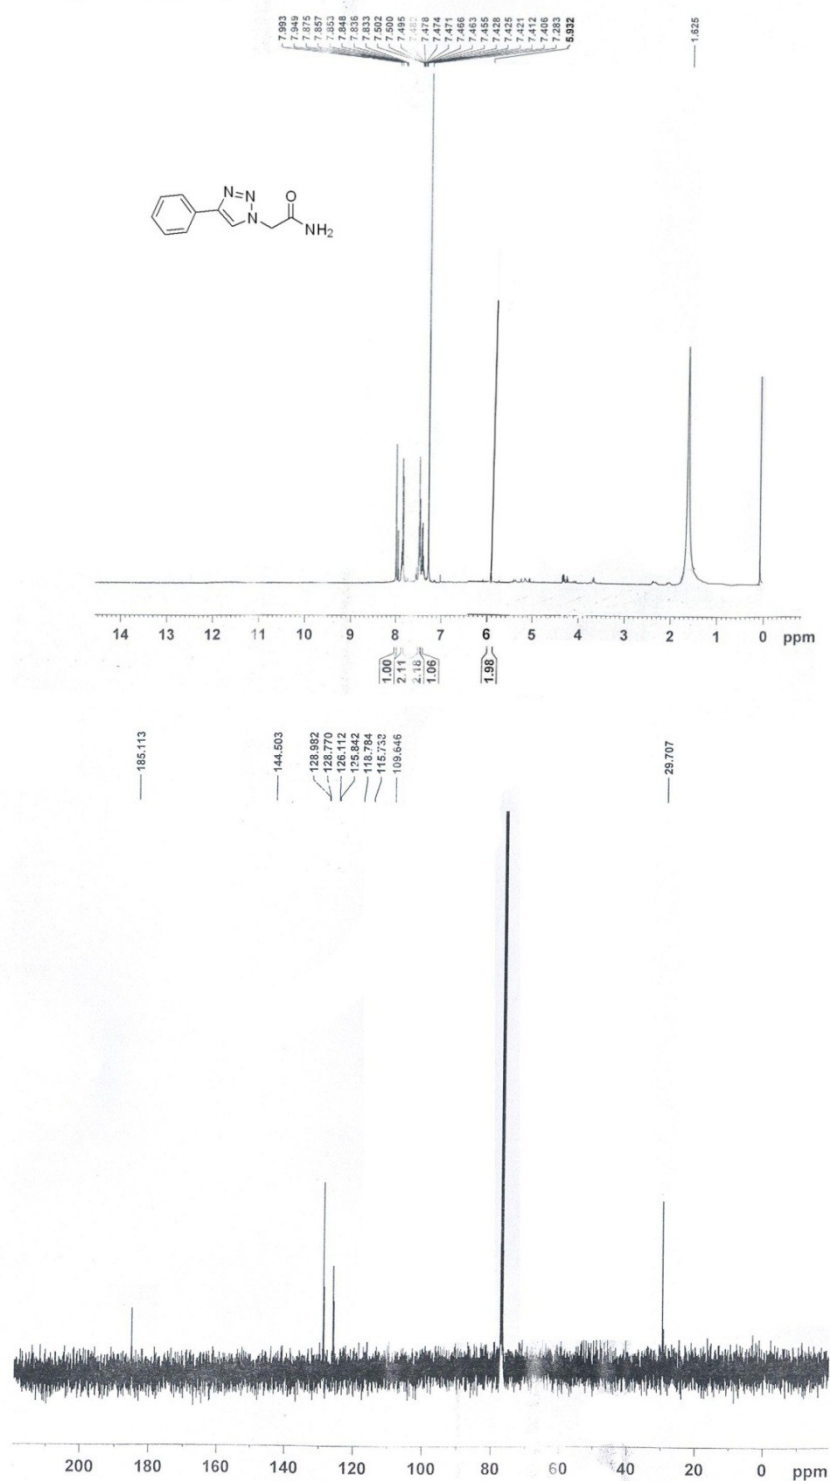

**1-(4-bromobenzyl)-4-pentyl-1H-1,2,3-triazole:**  $^1\text{H}$  NMR (400 MHz,  $\text{CDCl}_3$ )  $\delta$  = 0.85 (3H, t,  $J$  = 6.9 Hz), 1.27-1.30 (4 H, m), 1.59-1.63 (2H, m), 2.65 (2H, t,  $J$  = 7.4 Hz), 5.41 (2H, s), 7.09 (2H, d,  $J$  = 6.3 Hz), 7.21 (1H, s), 7.46 (2H, d,  $J$  = 6.3 Hz);  $^{13}\text{C}$  NMR (100 MHz,  $\text{CDCl}_3$ ) 13.9, 22.3, 25.6, 29.0, 13.9, 22.3, 25.6, 29.0, 31.4, 53.2, 120.5, 122.6, 129.5, 132.1, 134.0;

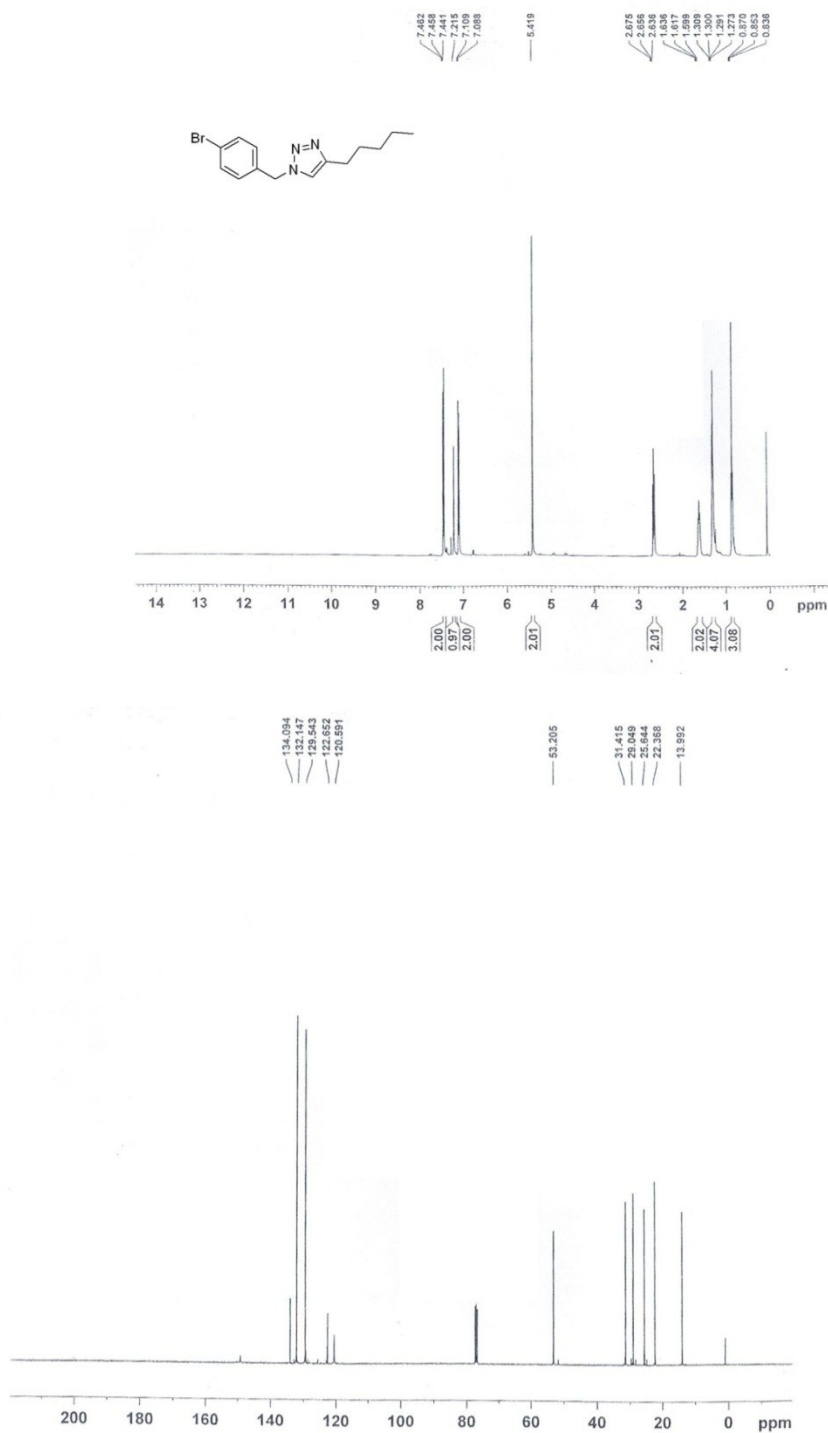

**1-benzyl-4-pentyl-1H-1,2,3-triazole:**

$^1\text{H}$  NMR (400 MHz,  $\text{CDCl}_3$ )  $\delta$  = 0.87 (3H, t,  $J$  = 6.9 Hz), 1.29-1.33 (4H, m), 1.61-1.65 (2H, m), 2.67 (2H, t,  $J$  = 7.4 Hz), 5.49 (2H, s), 7.17 (1H, s), 7.25 (2H, d,  $J$  = 8.0 Hz), 7.34-7.38 (3H, m);  
 $^{13}\text{C}$  NMR (100 MHz,  $\text{CDCl}_3$ ) 13.9, 22.3, 25.6, 29.0, 31.4, 53.9, 120.4, 127.9, 128.5, 129.0, 135.0, 148.9;

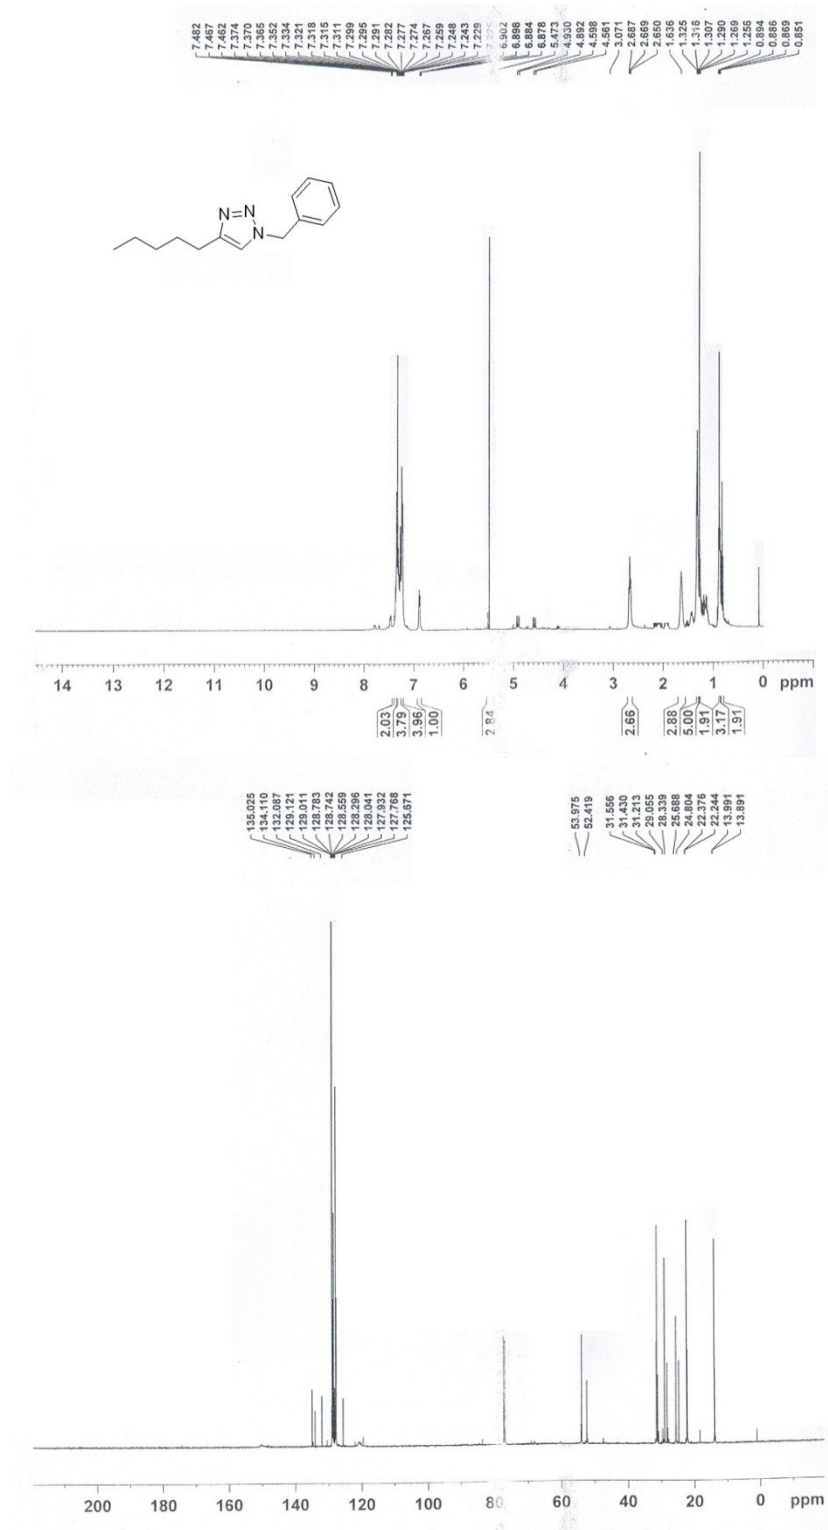



**1-(3-methylbut-2-en-1-yl)-4-phenyl-1H-1,2,3-triazole:**

$^1\text{H}$  NMR (400 MHz,  $\text{CDCl}_3$ )  $\delta$  = 1.81(6H, s), 4.97 (2H, d,  $J$ = 7.2Hz), 5.46 (1H, t,  $J$ = 7.2Hz), 7.28-7.36 (3H, m), 7.73 (1H, s), 7.82-7.85 (2H,m);  $^{13}\text{C}$  NMR (100 MHz,  $\text{CDCl}_3$ ) 18.1, 25.7, 48.1, 117.2, 119.2, 126.7, 128.1, 128.8, 139.9, 147.7

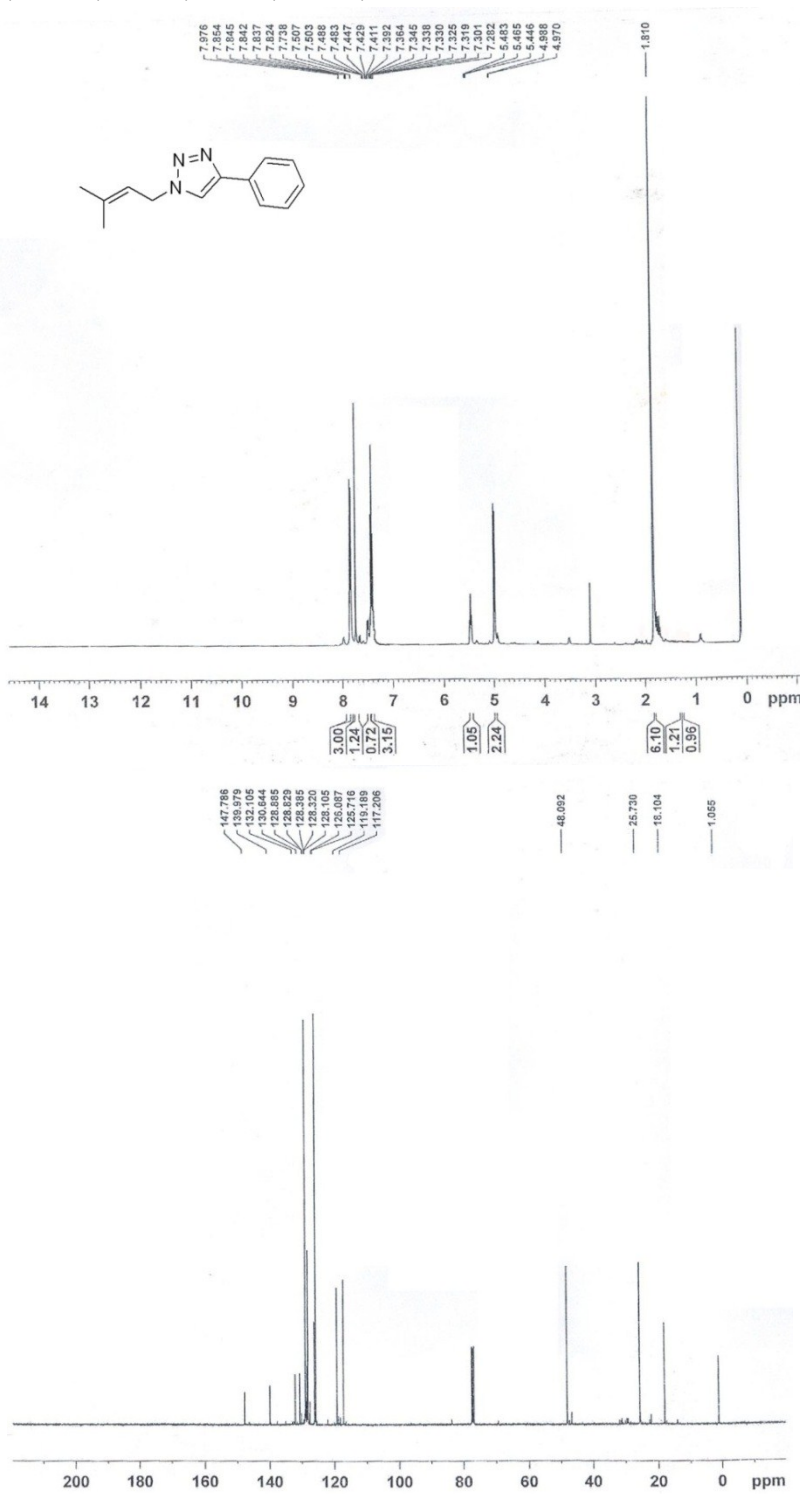

### 4-phenyl-1-propyl-1H-1,2,3-triazole:

White solid, mp 62-64°C,  $^1\text{H}$  NMR (400 MHz,  $\text{CDCl}_3$ )  $\delta$ : 0.99 (3H, t,  $J=7.3$ ), 1.97-2.02 (2H, m), 4.37 (2H, t,  $J=7.3$ ), 7.26-7.34 (1H, m, Ar), 7.42 (2H, t, Ar), 7.74 (1H, s), 7.83 (2H, d);  $^{13}\text{C}$  NMR (100 MHz,  $\text{CDCl}_3$ )  $\delta$ : 11.5, 24.1, 51.9, 119.8, 126.1, 128.5, 129.2, 130.70, 147.61

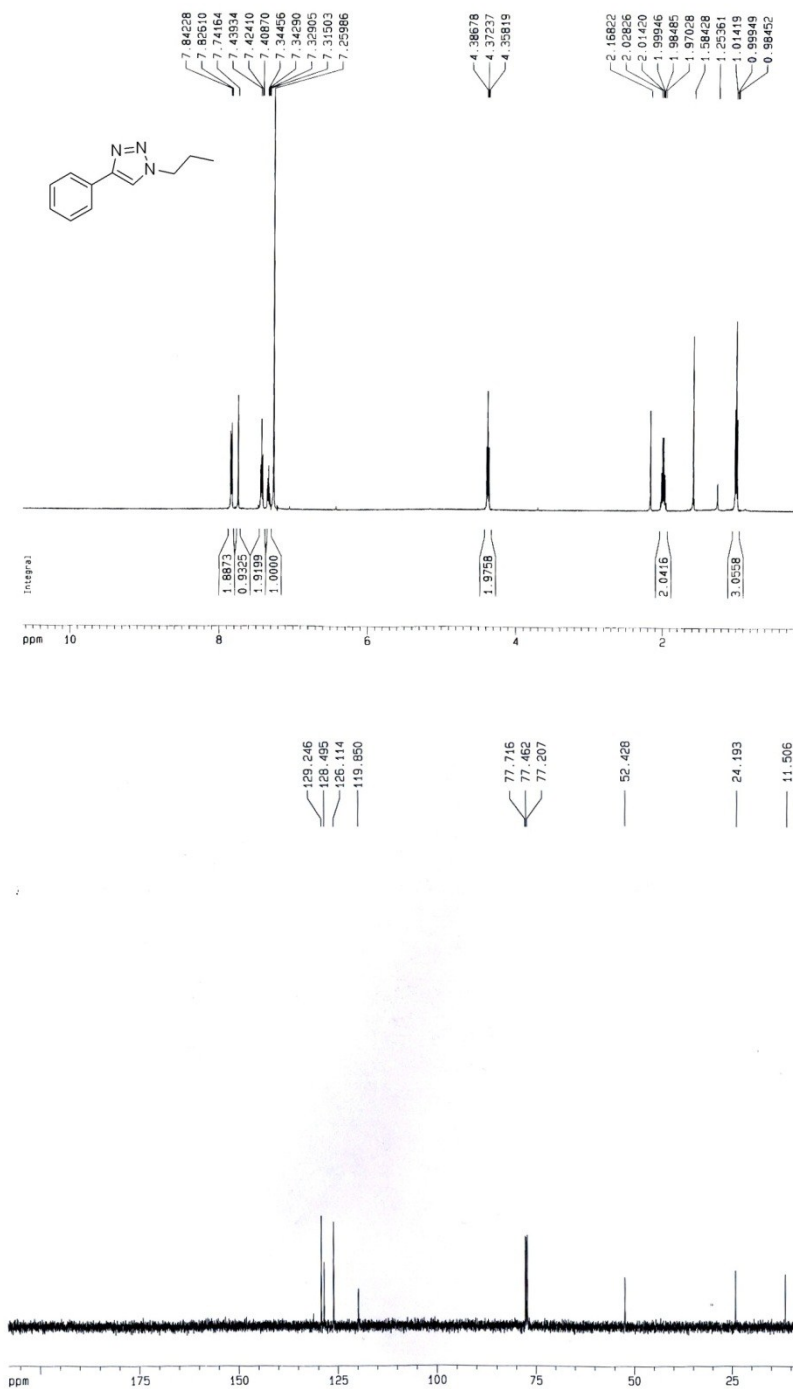

**1-(naphthalen-2-ylmethyl)-4-phenyl-1H-1,2,3-triazole:**  $^1\text{H}$  NMR (400 MHz,  $\text{CDCl}_3$ )  $\delta = 6.02$  (2H, s), 7.25-7.26 (2H, m), 7.33-7.34 (2H, m), 7.47-7.53 (4H, m), 7.72-7.74 (2H, m), 7.90 (2H, d,  $J = 5.2$ ), 8.00 (1H, d,  $J = 5.2$ );  $^{13}\text{C}$  NMR (100 MHz,  $\text{CDCl}_3$ ) 52.8, 119.8, 123.3, 125.7, 126.0, 126.8, 127.8, 128.3, 128.5, 129.1, 129.3, 130.2, 130.5, 130.9, 131.6, 134.3

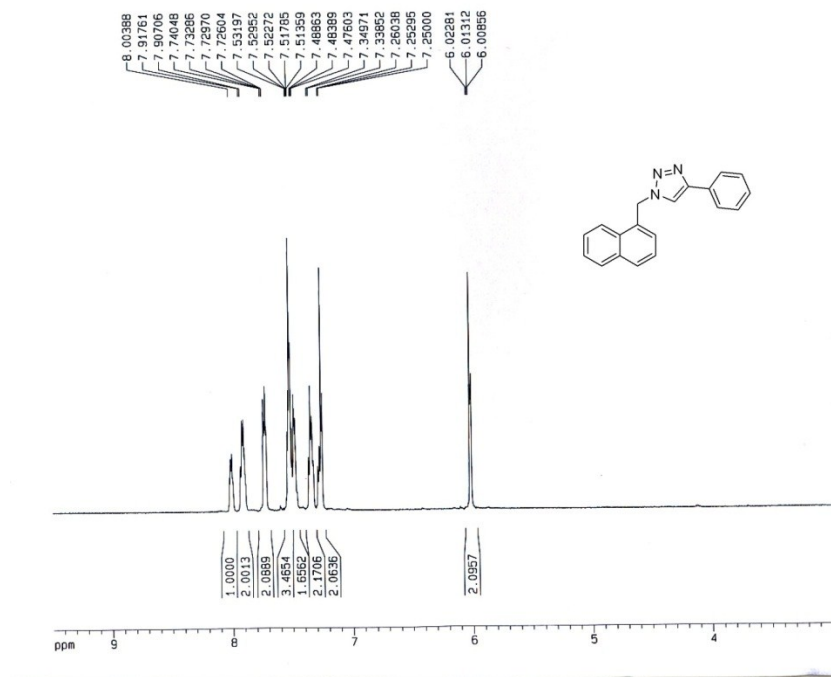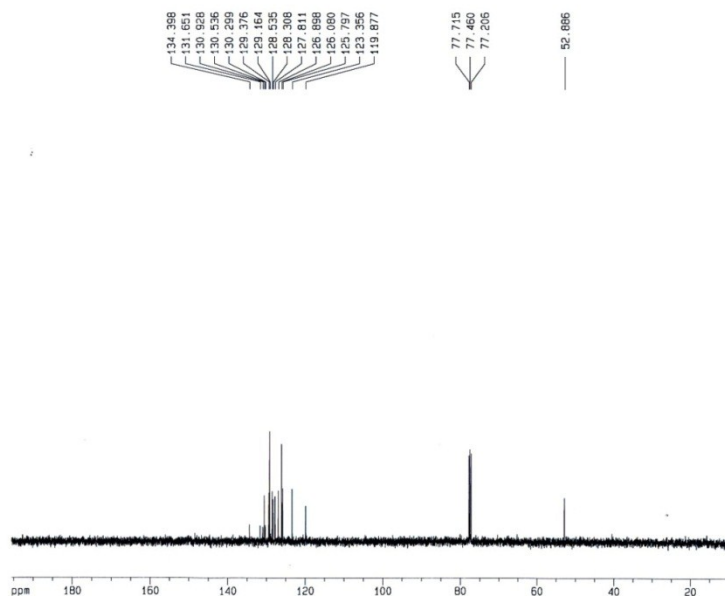

Supplement: c5ra25519h1.pdf [file c5ra25519h1.pdf]
